# Supplementary material
Source: PubMed Central journal article supplement (PMC5957533)
Supplement: NIHMS966204-supplement-SI.pdf [file NIHMS966204-supplement-SI.pdf]

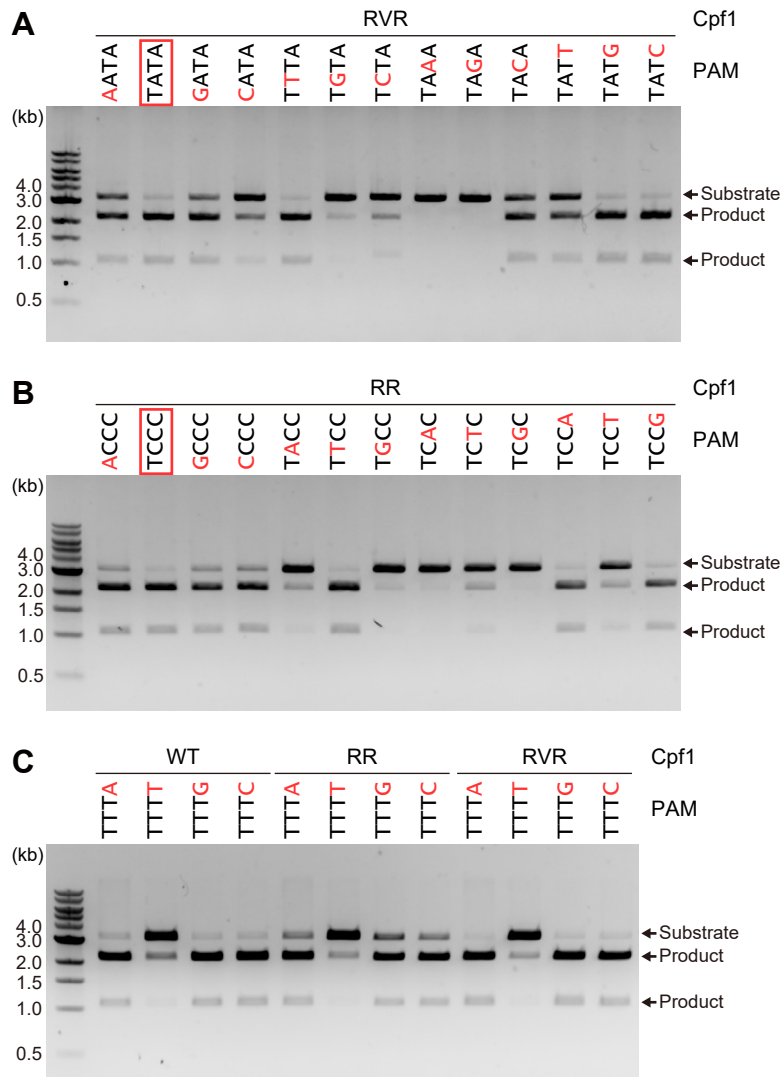

**Figure S1. *In vitro* Cleavage Activities of WT AsCpf1 and AsCpf1 Variants, Related to Figure 1**

(A and B) PAM specificities of the RVR (A) and RR (B) variants. The AsCpf1-crRNA complex (100 nM) was incubated at 37°C for 10 min with a linearized plasmid target with the different PAMs.

(C) Fourth PAM nucleotide preferences of WT AsCpf1 and the RVR and RR variants. The AsCpf1-crRNA complex (100 nM) was incubated at 37°C for 10 min with a linearized plasmid target with the TTTN PAMs.

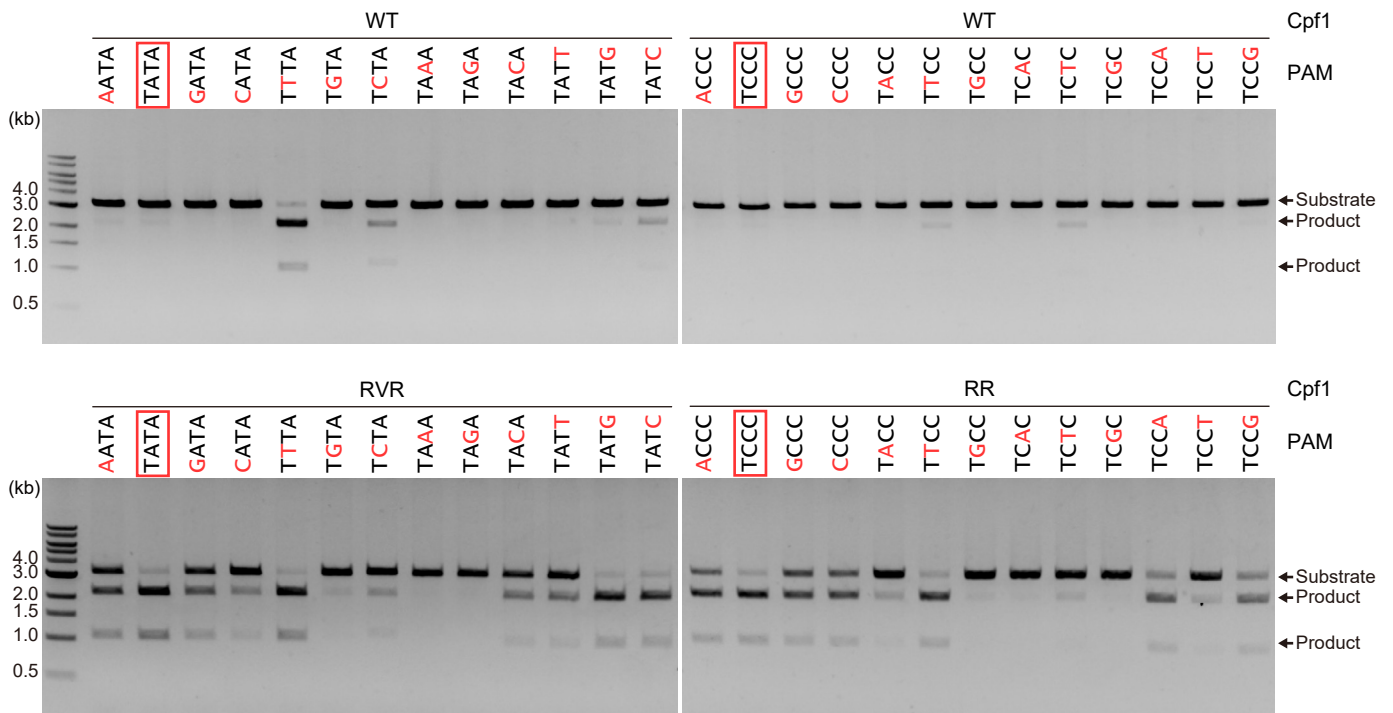

**Figure S2. Comparison of the PAM Specificities of WT AsCpf1 and AsCpf1 Variants, Related to Figure 1**

The AsCpf1-crRNA complex (100 nM) was incubated at 37°C for 5 min with a linearized plasmid target with the different PAMs. For comparison, the cleavage data for the RVR (Figure 1A) and RR (Figure 1B) variants are shown below those for WT AsCpf1.

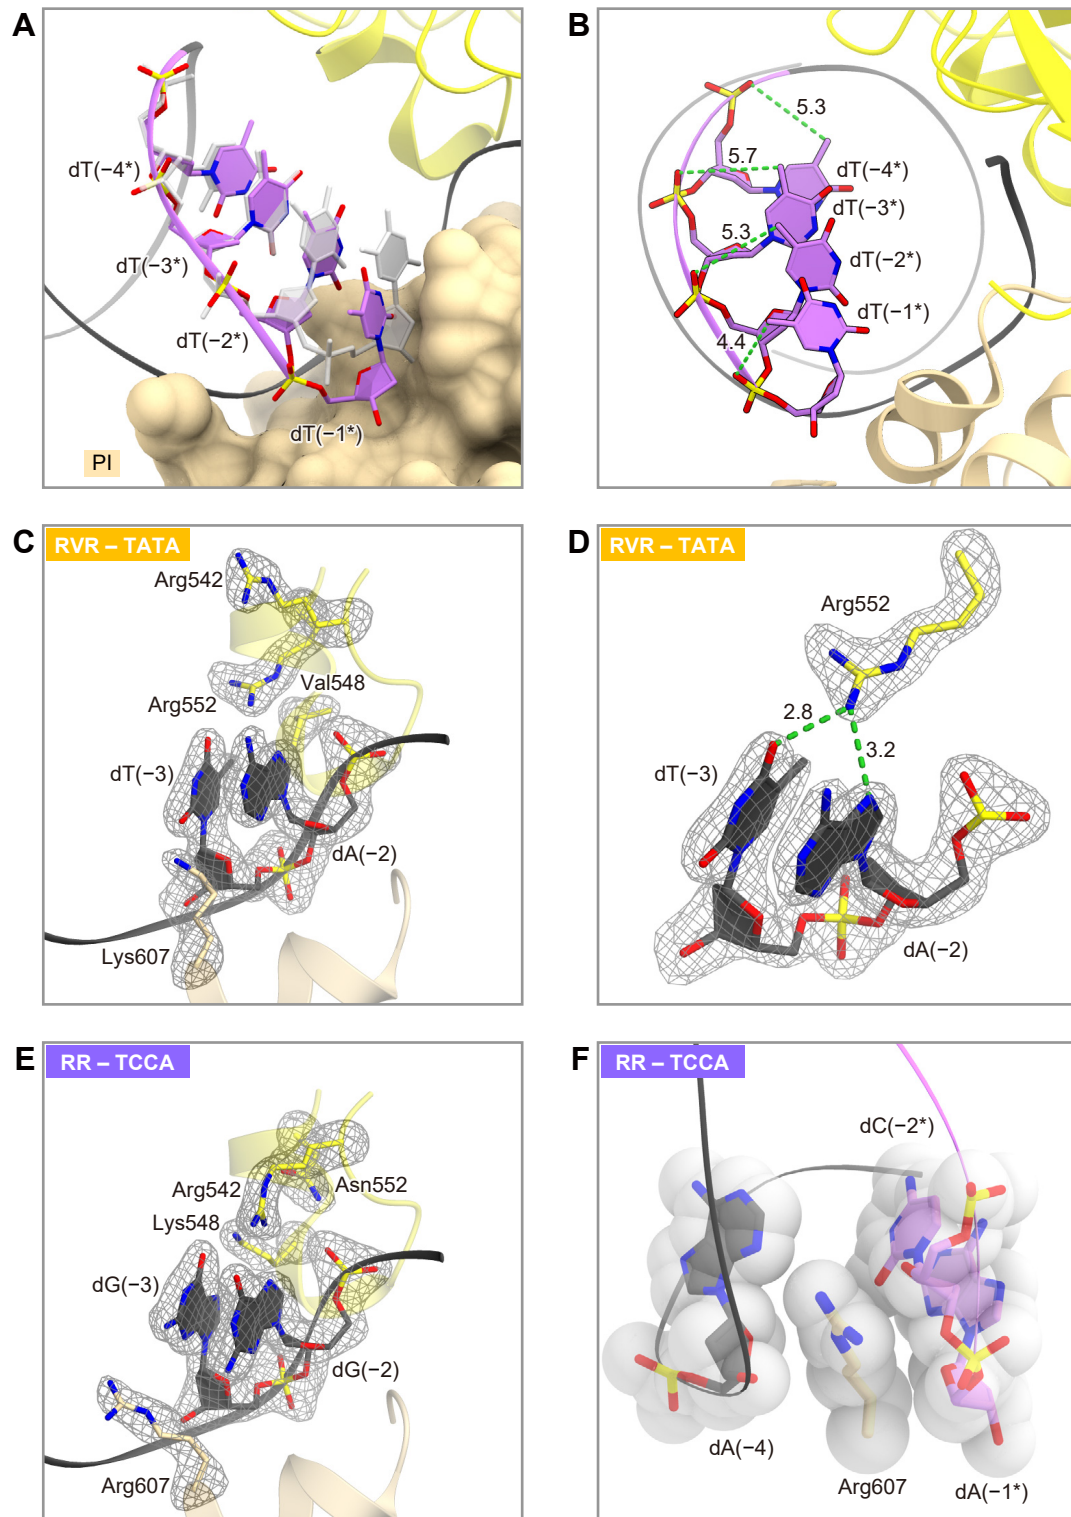

**Figure S3. PAM Recognition by the AsCpf1 Variants, Related to Figure 3**

(A) Conformational differences between the PAM nucleotides. The dT(-1\*) nucleotide was modeled into the WT AsCpf1 structure (Yamano et al., 2016) (PDB: 5B43). Superimposition of the nucleotides -5\* to -2\* (gray) onto the nucleotides -4\* to -1\* (purple) highlights the displacement of the fourth PAM nucleotide (at -1\* position), due to the interaction with the PI domain (shown as a surface representation).

(B) Differences in the distances between the 5-methyl group of the T nucleotide and its adjacent phosphate group at each PAM position. The dT(-1\*) nucleotide was modeled into the WT AsCpf1 structure (Yamano et al., 2016) (PDB: 5B43). The distances are given in Å.

(C)  $mF_o - DF_c$  omit electron density map for the key residues and nucleotides in the RVR variant (contoured at  $4\sigma$ ).

(D) Hydrogen-bonding interactions between Arg552 and the PAM duplex. The  $mF_o - DF_c$  omit electron density map is shown as a gray mesh (contoured at  $5\sigma$ ). Hydrogen bonds are shown as dashed lines, and the distances are given in Å.

(E)  $mF_o - DF_c$  omit electron density map for the key residues and nucleotides in the RR variant (contoured at  $4\sigma$ ).

(F) Hydrophobic interactions between Arg607 and the PAM duplex.

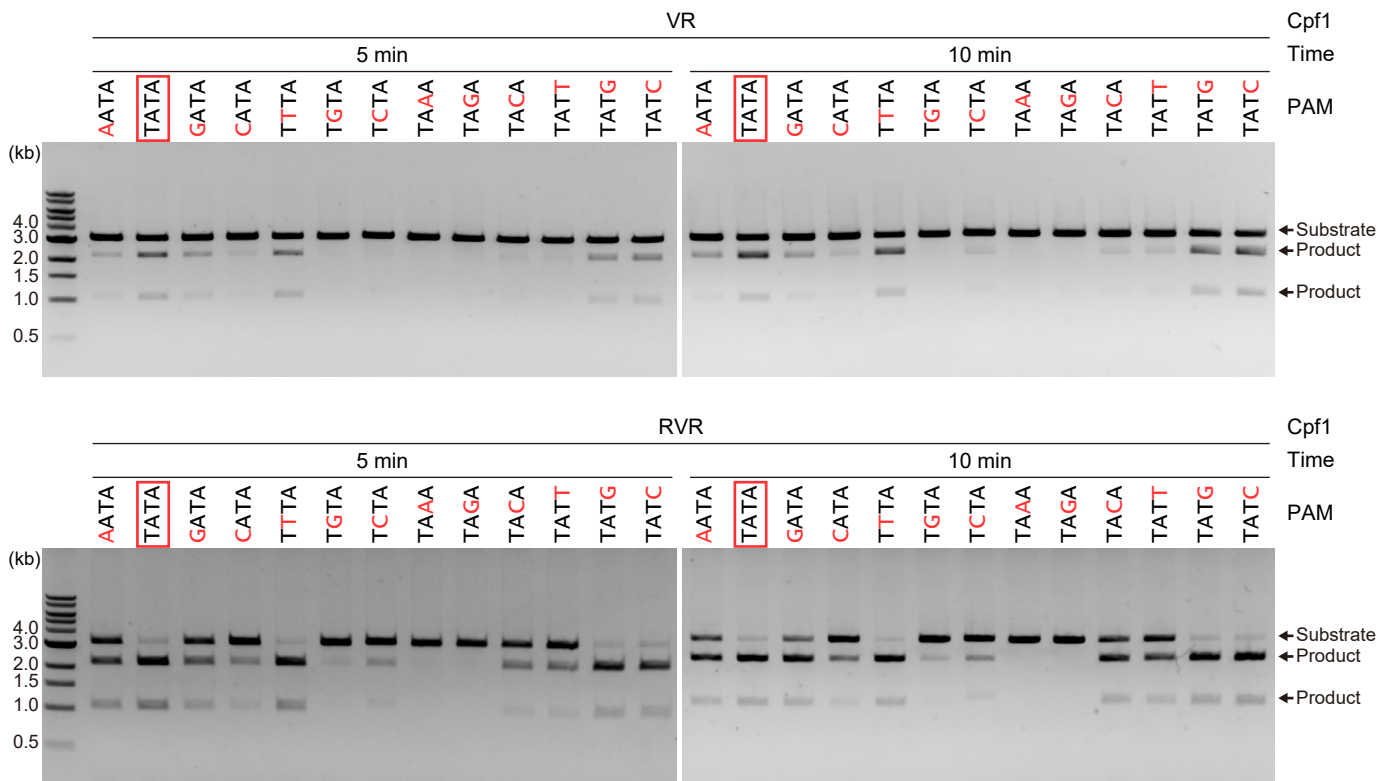

**Figure S4. *In vitro* Cleavage Activity of the VR Variant, Related to Figure 4**

The AsCpf1-crRNA complex (100 nM) was incubated at 37°C for 5 or 10 min with a linearized plasmid target with the different PAMs. For comparison, the cleavage data for the RVR variant (Figures 1A and S1A) are shown below those for the VR variant.

**Table S1 Oligonucleotides**

| Oligonucleotides used to generate the AsCpf1 variant                          |                                            |                               |
|-------------------------------------------------------------------------------|--------------------------------------------|-------------------------------|
| Mutation                                                                      | Forward primer                             | Reverse primer                |
| RR_S542R                                                                      | AGAGGCTGGGACGTGAATAAGGAGAAGA               | GGCCAGTGTAGGCATCTGAAAGTTC     |
| RR_K607R                                                                      | ATCCCAAGATGCAGCACCCAGCTGAAG                | GCTGCATCTTTGGGATCATCTTGGCGGC  |
| RVR_S542R                                                                     | AGAGGCTGGGACGTGAATGTTGAGAAGA               | GGCCAGTGTAGGCATCTGAAAGTTC     |
| RVR_K548V_N552R                                                               | GAACAGAGGCGCCATCCTGTTGTGAAGAAC             | TTCTCAACATTCACGTCCCAGCCAGAGGC |
| DNA oligonucleotides used for crystallization                                 |                                            |                               |
| PAM sequence                                                                  | Target DNA strand                          | Non-target DNA strand         |
| TCCA                                                                          | GGTTGCCAAGCGCACCTAATTTCTGGAGGACTG          | CAGTCCTCCA                    |
| TATA                                                                          | GGTTGCCAAGCGCACCTAATTTCTATAGGACTG          | CAGTCCTATA                    |
| crRNA                                                                         |                                            |                               |
| AsCpf1 crRNA                                                                  | AAUUUCUACUCUUGUAGAUGGAAUUAGGUGCGCUUGGCAACC |                               |
| Oligonucleotides used to generate the target plasmids with the different PAMs |                                            |                               |
| PAM sequence                                                                  | Forward primer                             | Reverse primer                |
| TTTA                                                                          | TTTAGGAAATTAGGTGCGCTTGGAACC                | GTATTTAGAAAAATAACAAATAGGG     |
| TTTT                                                                          | TTTTGGAAATTAGGTGCGCTTGGAACC                |                               |
| TTTG                                                                          | TTTGGAAATTAGGTGCGCTTGGAACC                 |                               |
| TTTC                                                                          | TTTCGGAAATTAGGTGCGCTTGGAACC                |                               |
| TCCC                                                                          | TCCCGGAAATTAGGTGCGCTTGGAACC                |                               |
| ACCC                                                                          | ACCCGGAAATTAGGTGCGCTTGGAACC                |                               |
| GCCC                                                                          | GCCCGGAAATTAGGTGCGCTTGGAACC                |                               |
| CCCC                                                                          | CCCCGGAAATTAGGTGCGCTTGGAACC                |                               |
| TACC                                                                          | TACCGGAAATTAGGTGCGCTTGGAACC                |                               |
| TTCC                                                                          | TTCCGGAAATTAGGTGCGCTTGGAACC                |                               |
| TGCC                                                                          | TGCCGGAAATTAGGTGCGCTTGGAACC                |                               |
| TCAC                                                                          | TCACGGAAATTAGGTGCGCTTGGAACC                |                               |
| TCTC                                                                          | TCTCGGAAATTAGGTGCGCTTGGAACC                |                               |
| TCGC                                                                          | TCGCGGAAATTAGGTGCGCTTGGAACC                |                               |
| TCCA                                                                          | TCCAGGAAATTAGGTGCGCTTGGAACC                |                               |
| TCCT                                                                          | TCCTGGAAATTAGGTGCGCTTGGAACC                |                               |
| TCCG                                                                          | TCCGGGAAATTAGGTGCGCTTGGAACC                |                               |
| TATA                                                                          | TATAGGAAATTAGGTGCGCTTGGAACC                |                               |
| AATA                                                                          | AATAGGAAATTAGGTGCGCTTGGAACC                |                               |
| GATA                                                                          | GATAGGAAATTAGGTGCGCTTGGAACC                |                               |
| CATA                                                                          | CATAGGAAATTAGGTGCGCTTGGAACC                |                               |
| TGTA                                                                          | TGTAGGAAATTAGGTGCGCTTGGAACC                |                               |
| TCTA                                                                          | TCTAGGAAATTAGGTGCGCTTGGAACC                |                               |
| TAAA                                                                          | TAAAGGAAATTAGGTGCGCTTGGAACC                |                               |
| TAGA                                                                          | TAGAGGAAATTAGGTGCGCTTGGAACC                |                               |
| TACA                                                                          | TACAGGAAATTAGGTGCGCTTGGAACC                |                               |
| TATT                                                                          | TATTGGAAATTAGGTGCGCTTGGAACC                |                               |
| TATG                                                                          | TATGGGAAATTAGGTGCGCTTGGAACC                |                               |
| TATC                                                                          | TATCGGAAATTAGGTGCGCTTGGAACC                |                               |
